# Supplementary material for: A copy number variant is associated with a spectrum of pigmentation patterns in the rock pigeon (Columba livia)
Source: PubMed Central journal article supplement (PMC7239393; doi:10.1371/journal.pgen.1008274), 2020-05-20
Supplement: pgen.1008274.s009.pdf [file pgen.1008274.s009.pdf]

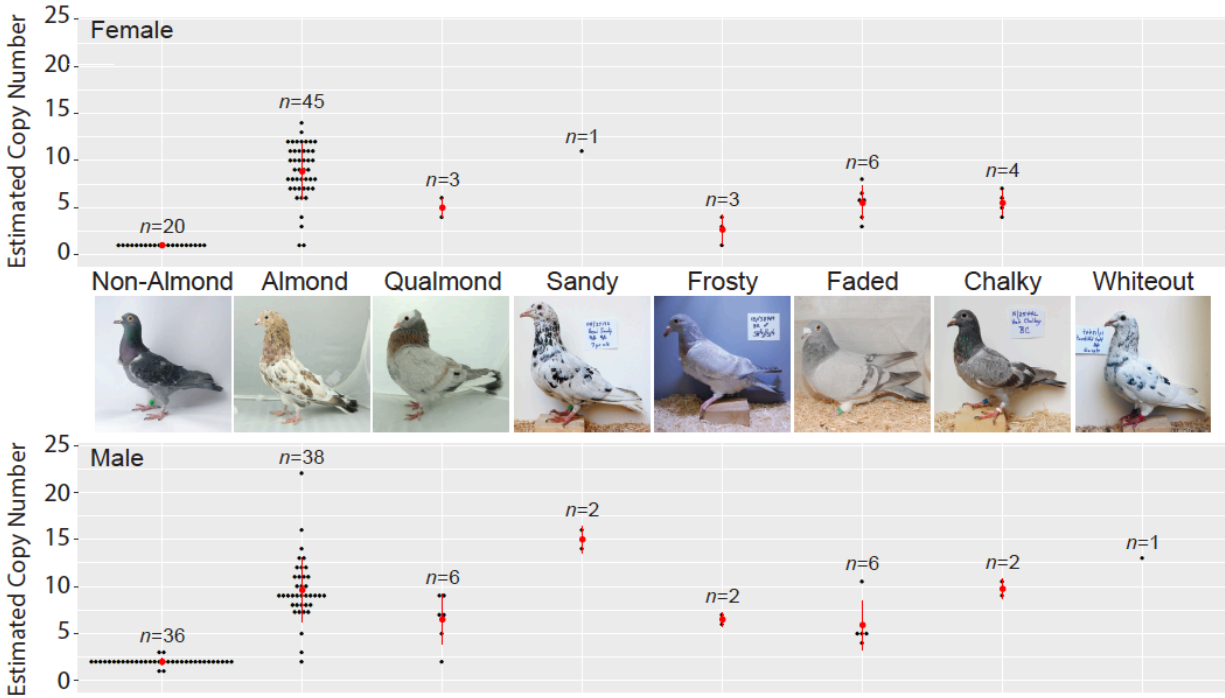

**S3 Figure.** *St*-linked pigmentation phenotypes show quantitative variation in the Almond CNV. Black dots represent results of a TaqMan copy number assay. Mean copy numbers for each phenotype are shown as red dots. These are the same data shown in Figure 4 separated by sex.
